# Supplementary material for: A biotin-stabilized HKUST-1/ADM scaffold for facilitating MSC endothelial differentiation and vascularization in diabetic wound healing
Source: Royal Society of Chemistry journal article supplement (doi:10.1039/d2bm01443b), 2022-12-14
Supplement: d2bm01443b1.pdf [file d2bm01443b1.pdf]

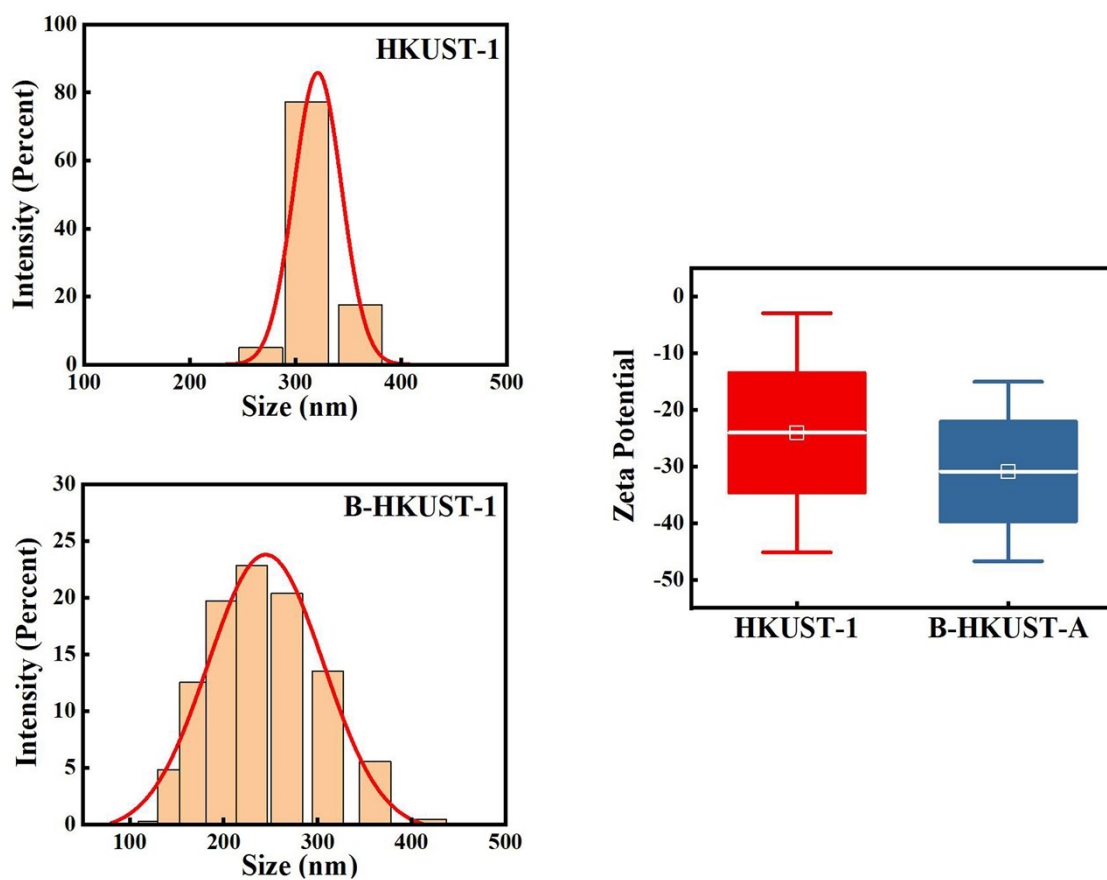

**FigureS1** The size distribution and Zeta potential of HKUST-1 and B-HKUST-1 in distilled water.

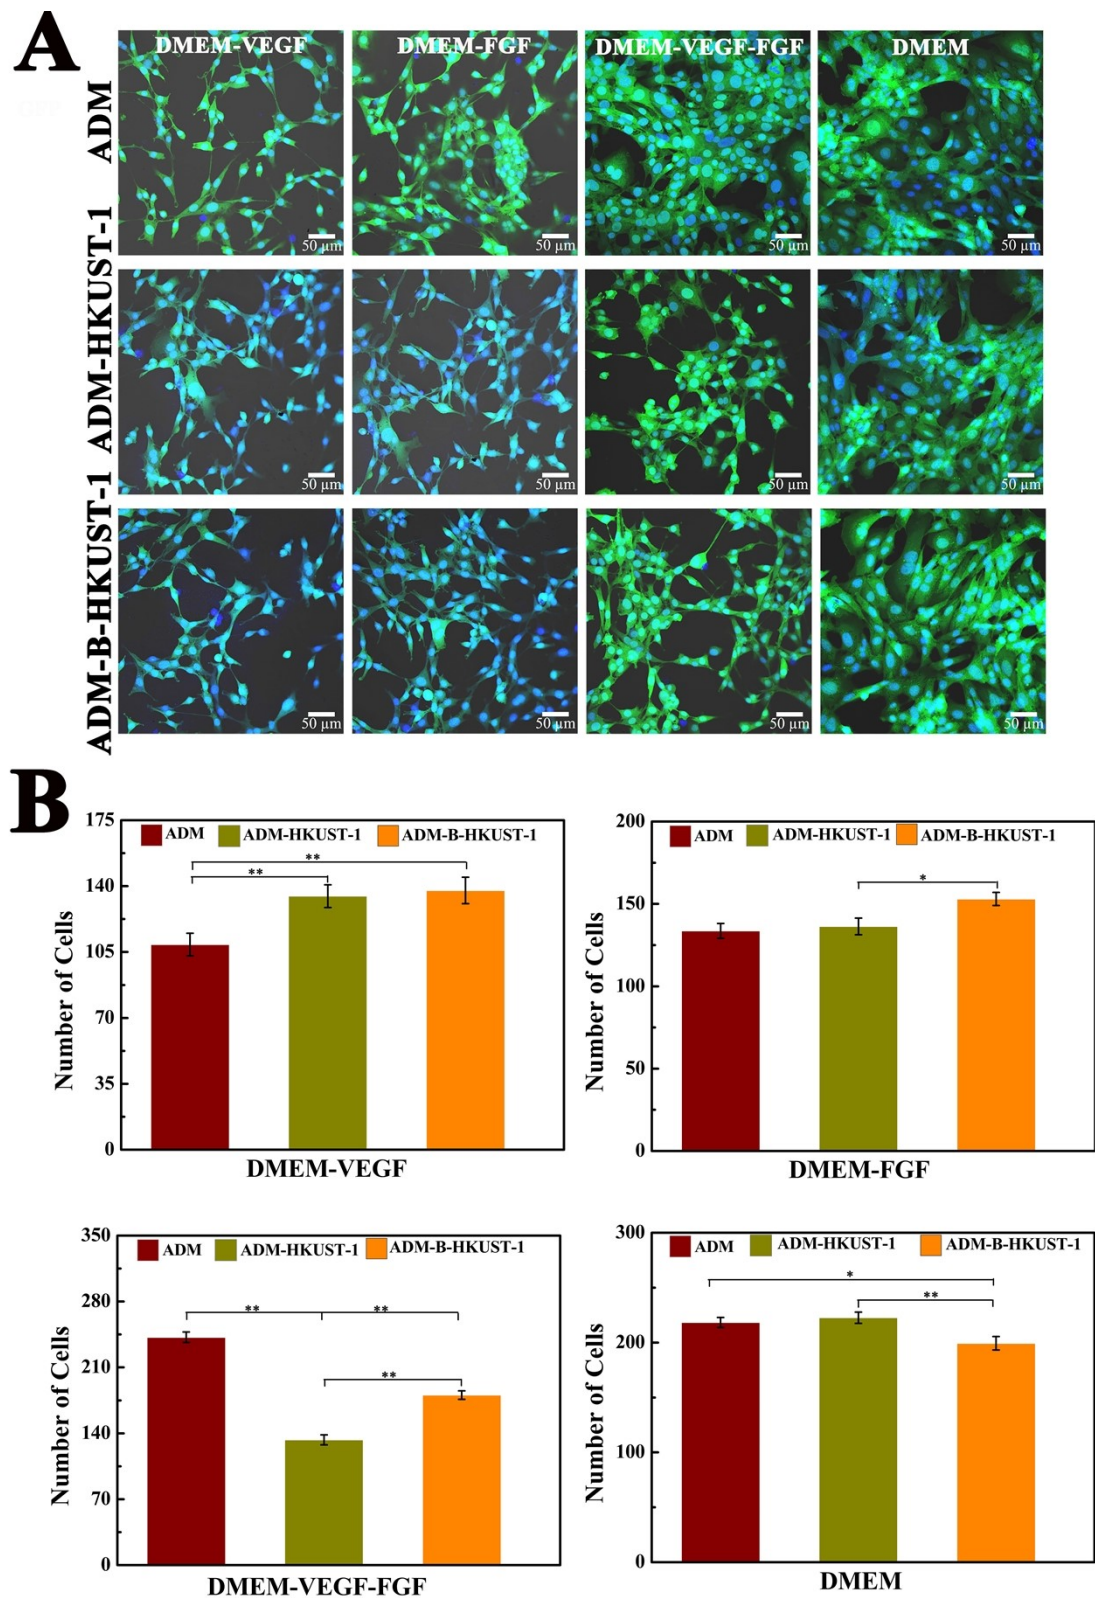

**FigureS2** MSCs differentiated into vascular endothelial cells 7 days later. Representative images of GFP (green) and DAPI (blue) staining in the (A) ADM, ADM-HKUST-1 and

ADM-B-HKUST-1 groups. (B) Quantitative analysis of the number of cells in each medium at 7 days. Original magnification: 20x, scale bar: 50  $\mu$ m.

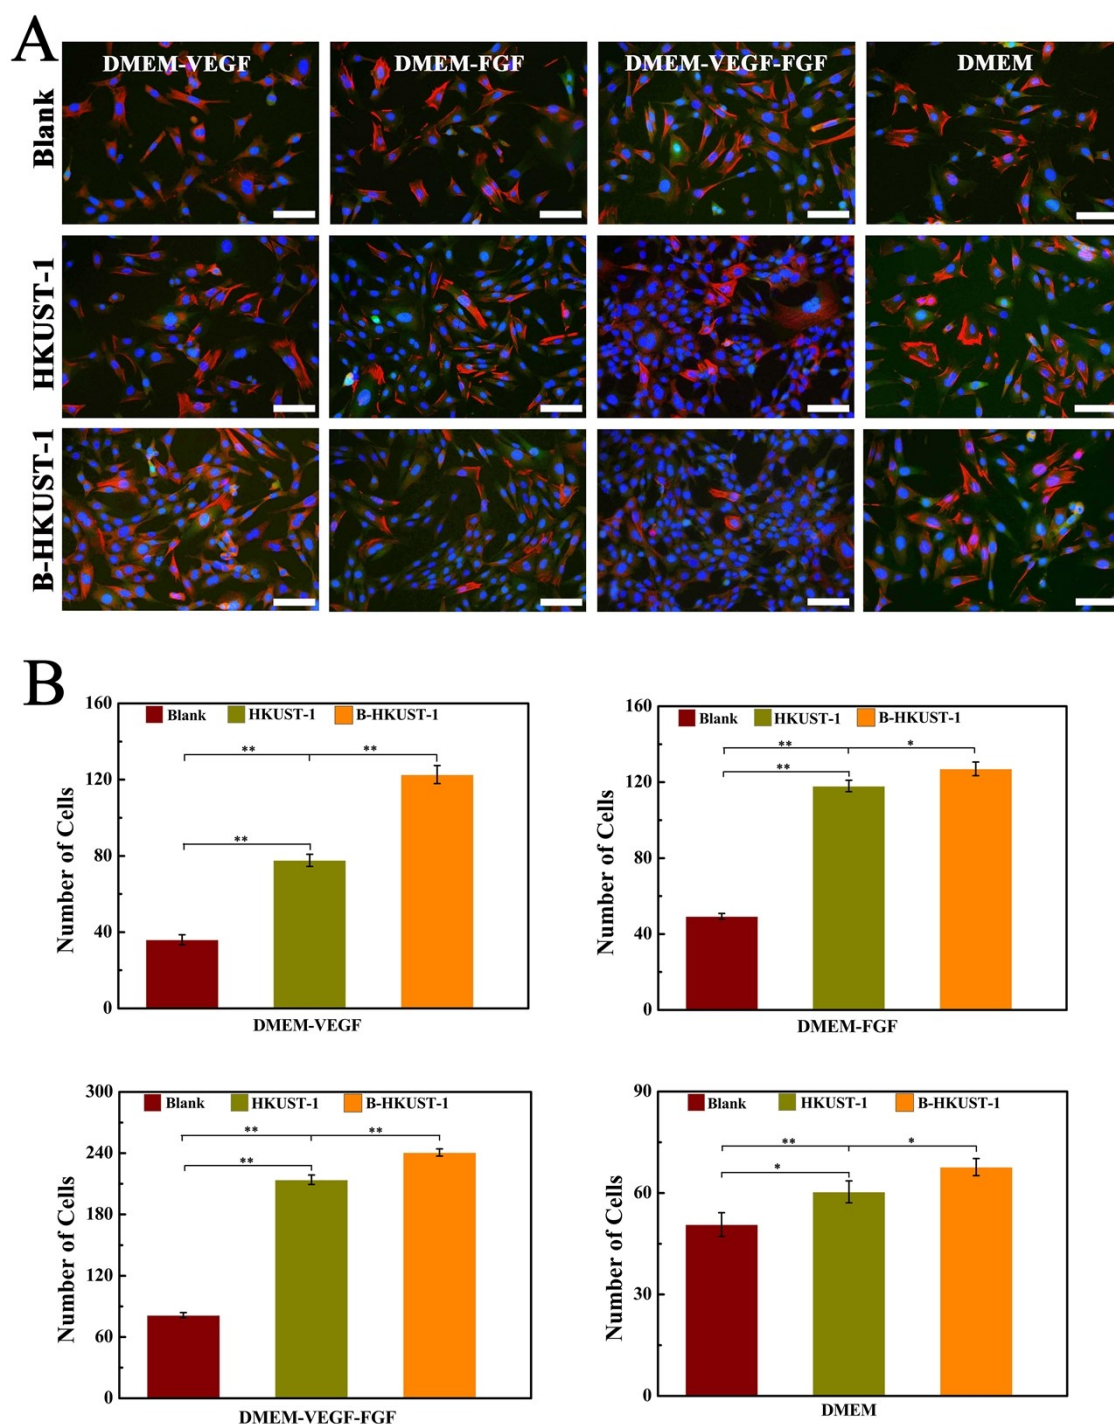

**Figure S3** Single-labeled immunofluorescence analysis of  $\alpha$ -SMA after 10 days (A) of differentiation. Quantitative analysis of cell number at 10 days (B). Original

magnification: 200×, scale bars: 100 μm. \*p < 0.05, \*\*p < 0.01.

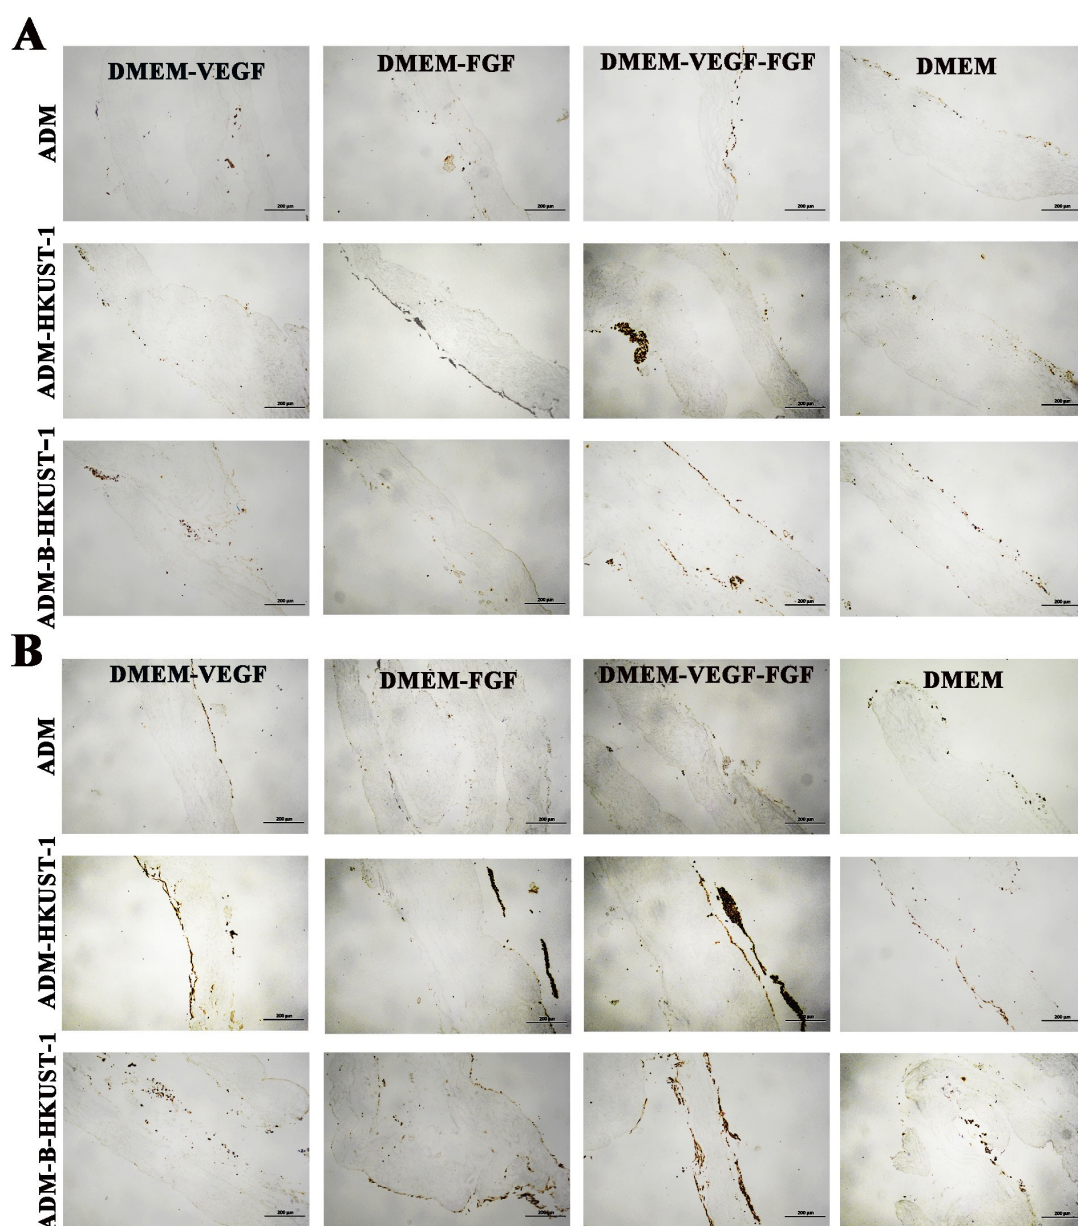

**Figure S4** Differentiation analysis of composite scaffolds. Single-labeled Immunohistochemistry analysis of  $\alpha$ -SMA after 10 days(A) and 20 days (B) of differentiation (Brown: positive area expression, blue: negative area expression).

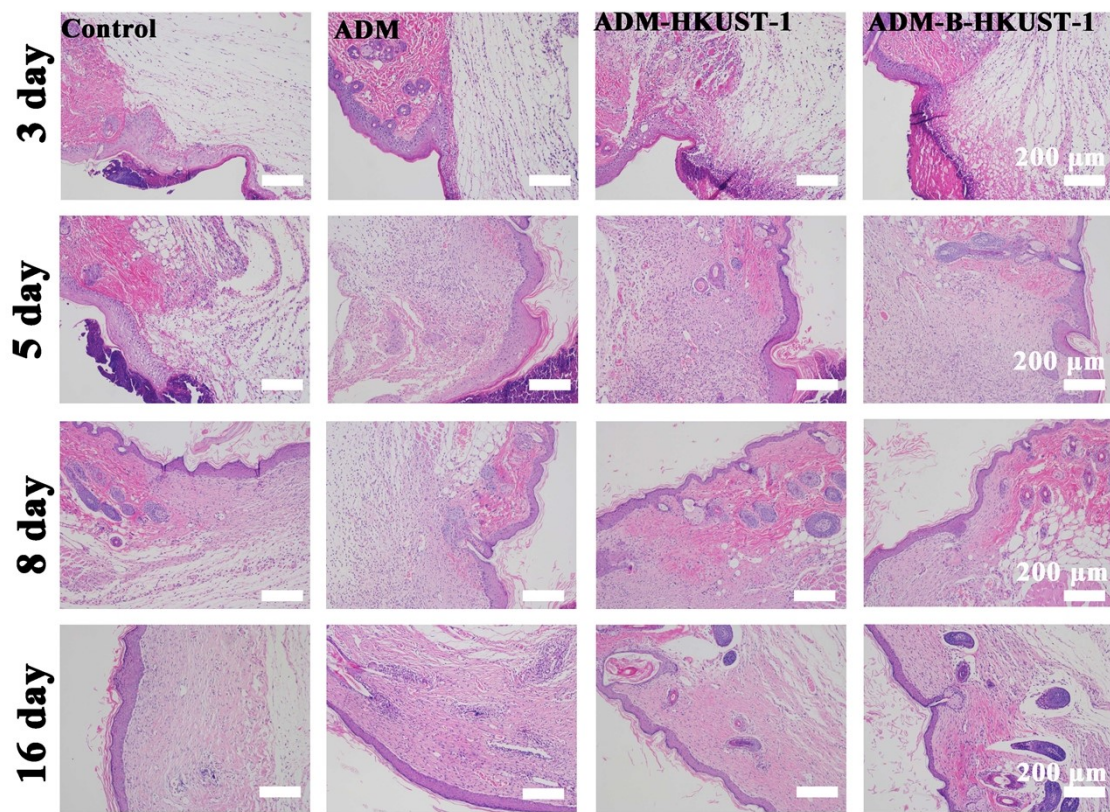

**Figure S5** Micrographs of H&E stained wound beds at 3, 5, 8 and 16 days postwounding from different groups and trichrome-stained of the healing wounds in the control, ADM, ADM-HKUST-1, ADM-B-HKUST-1.

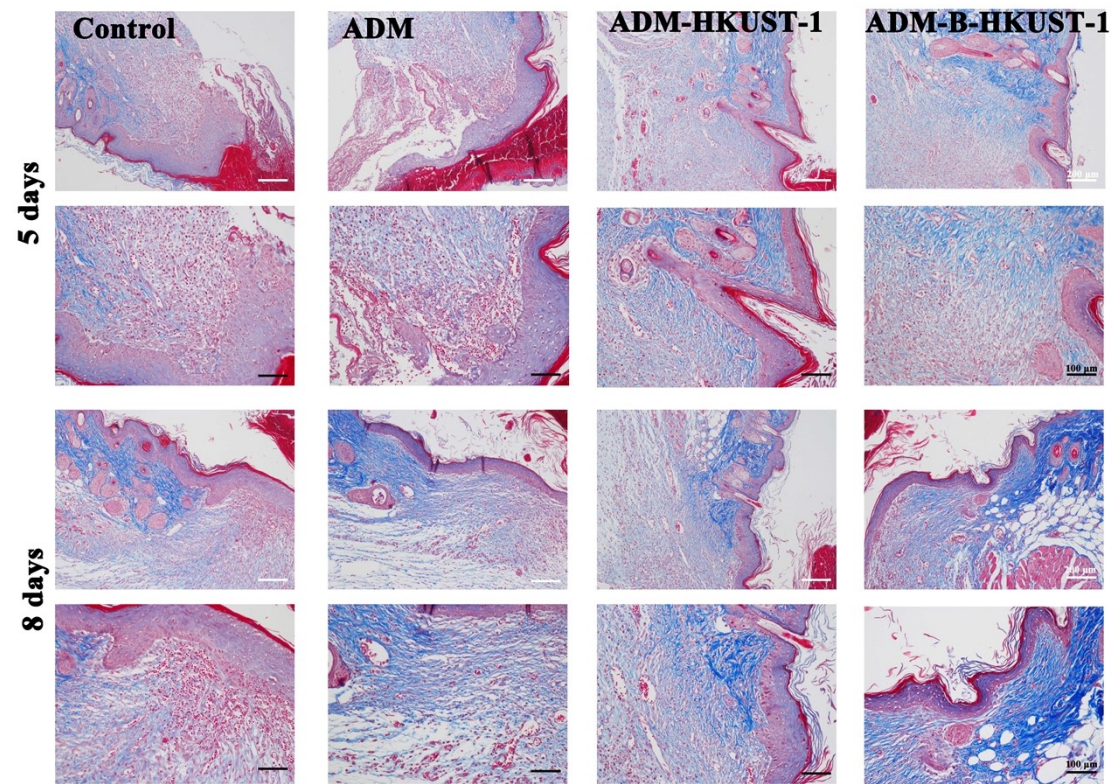

**Figure S6** Micrographs of trichrome-stained of the healing wounds in the control, ADM, ADM-HKUST-1 and ADM-B-HKUST-1 at 5 days and 8 days.

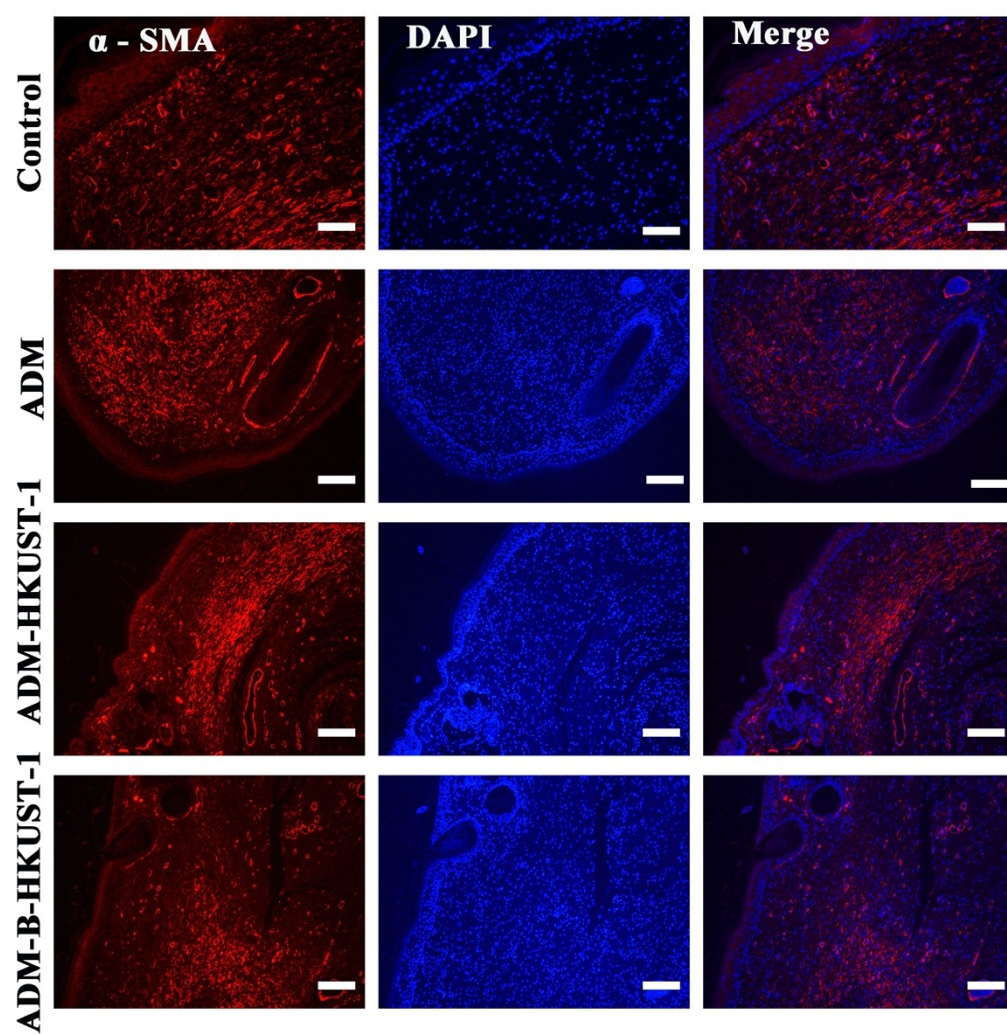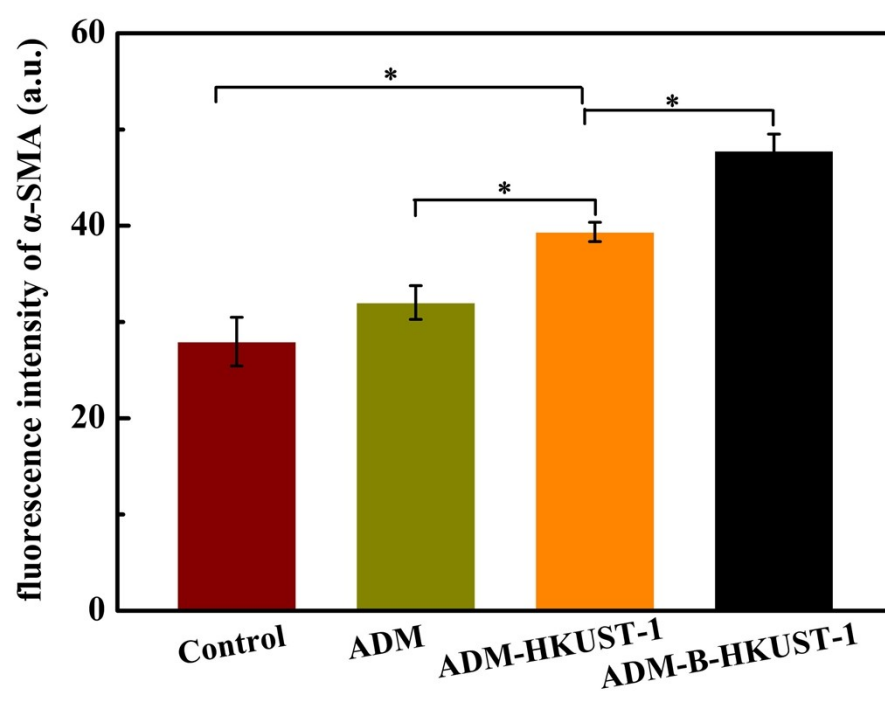

**Figure S7** Single-labeled immunofluorescence analysis of  $\alpha$ -SMA in the wound bed.
